# Supplementary material for: Cooperation in a transboundary river basin: a large-scale socio-hydrological model of the Eastern Nile
Source: Copernicus journal article supplement (doi:10.5194/hess-27-1201-2023), 2023-03-17
Supplement: Supplementary file 1 [file hess-27-1201-2023-supplement.pdf]

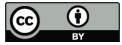

*Supplement of*

## **Cooperation in a transboundary river basin: a large-scale socio-hydrological model of the Eastern Nile**

**Mohammad Ghoreishi et al.**

*Correspondence to:* Mohammad Ghoreishi (mohammad.ghoreishi@usask.ca)

The copyright of individual parts of the supplementary might differ from the article licence.

## Supplement

**Table S1: Individual variables and corresponding data sources used by Food and Agriculture Organization Data (2020b) for estimating the political stability index (Worldwide Governance Indicators, 2021)**

| Variables                                                              | Sources                                                               |
|------------------------------------------------------------------------|-----------------------------------------------------------------------|
| Orderly transfers                                                      | Economist Intelligence Unit Riskwire & Democracy Index                |
| Armed conflict                                                         |                                                                       |
| Violent demonstrations                                                 |                                                                       |
| Social unrest                                                          |                                                                       |
| International tensions / terrorist threat                              |                                                                       |
| Political terror scale                                                 | Cingranelli Richards Human Rights Database and Political Terror Scale |
| Security risk rating                                                   | iJET Country Security Risk Ratings                                    |
| Intensity of internal conflicts: ethnic, religious, or regional        | Institutional Profiles Database                                       |
| Intensity of violent activities of underground political organizations |                                                                       |
| Intensity of social conflicts (excluding conflicts relating to land)   |                                                                       |
| Government stability                                                   | Political Risk Services International Country Risk Guide              |
| Internal conflict                                                      |                                                                       |
| External conflict                                                      |                                                                       |
| Ethnic tensions                                                        |                                                                       |
| Protests and riots                                                     | Global Insight Business Conditions and Risk Indicators                |
| Terrorism                                                              |                                                                       |
| Interstate war                                                         |                                                                       |

**Table S2: List of Abbreviations**

| <b>Abbreviation</b> | <b>Explanation</b>                                                             |
|---------------------|--------------------------------------------------------------------------------|
| <b>BC</b>           | Basin-wide Cooperation                                                         |
| <b>C&amp;C</b>      | Conflict and Cooperation                                                       |
| <b>CFA</b>          | Cooperative Framework Agreement                                                |
| <b>CS</b>           | Cooperation Status                                                             |
| <b>ENB</b>          | Eastern Nile Basin                                                             |
| <b>ENSH</b>         | Eastern Nile Basin Socio-hydrological                                          |
| <b>FC</b>           | Food Consumption                                                               |
| <b>FDI</b>          | Foreign direct investment                                                      |
| <b>FP</b>           | Food Production                                                                |
| <b>GERD</b>         | Grand Ethiopian Renaissance Dam                                                |
| <b>HAD</b>          | High Aswan Dam                                                                 |
| <b>HP</b>           | Hydropower Generation                                                          |
| <b>JMP</b>          | Joint Multipurpose Project                                                     |
| <b>NBI</b>          | Nile Basin Initiative                                                          |
| <b>PDC</b>          | Potential Dam Capacity                                                         |
| <b>PEC</b>          | Potential Energy Capacity                                                      |
| <b>PS</b>           | Political Stability                                                            |
| <b>S</b>            | Reservoir Storage under Construction                                           |
| <b>SWAT</b>         | Soil Water Assessment Tool                                                     |
| <b>TECCONILE</b>    | Technical Cooperation Commission for the Promotion and Development of the Nile |
| <b>VARS</b>         | Variogram Analysis of Response Surfaces                                        |
| <b>WC</b>           | Willingness to Cooperate                                                       |

**Table S3: Summary of the main equations, variables, and factors in the Eastern Nile Basin Socio-hydrological (ENSH) model**

| Model Component          | Equation                                                                                                                                                                                                                                                                                                                                                                                            | Variables/Factors                                                                                                                                                                                                                                                                                                                                                                                                                                                                                                                                                                                                                                                                                                                                                                                                                                                                                                                                                                              |
|--------------------------|-----------------------------------------------------------------------------------------------------------------------------------------------------------------------------------------------------------------------------------------------------------------------------------------------------------------------------------------------------------------------------------------------------|------------------------------------------------------------------------------------------------------------------------------------------------------------------------------------------------------------------------------------------------------------------------------------------------------------------------------------------------------------------------------------------------------------------------------------------------------------------------------------------------------------------------------------------------------------------------------------------------------------------------------------------------------------------------------------------------------------------------------------------------------------------------------------------------------------------------------------------------------------------------------------------------------------------------------------------------------------------------------------------------|
| Willingness to Cooperate | $WC_{Eth,t} = \left( \beta_{1,Eth} \cdot \left( \frac{FC_{Eth,t}}{FP_{Eth,t}} \right)^{-1} + \beta_{2,Eth} \cdot \left( \frac{PEC_{Eth,t}}{HP_{Eth}} \right)^{-1} + \beta_{3,Eth} \cdot \frac{S_{Eth,t}}{PDC_{Eth}} \right)^{\alpha_{1,Eth}} \cdot (1 - PS_{Eth,t})^{\alpha_{2,Eth}} \cdot (1 - FDI_{Eth,t})^{\alpha_{3,Eth}} \cdot \left( \frac{CS_{Eth,t}}{n} \right)^{\alpha_{4,Eth}} \quad (1)$ | <p><math>WC_t</math> (-): countries' willingness to cooperate at time t</p> <p><math>\beta_1, \beta_2</math>, and <math>\beta_3</math> (-): countries' emphasis on the food gap, the energy gap, and future reservoir storage</p> <p><math>FC_t</math> (kg): countries' food consumption at time t</p> <p><math>FP_t</math> (kg): countries' food production at time t</p> <p><math>PEC_t</math> (MW): countries' potential energy capacity at time t</p> <p><math>HP</math> (MW): countries' energy production</p> <p><math>S_t</math> (m<sup>3</sup>): countries' reservoir storage under construction at time t</p> <p><math>PDC</math> (m<sup>3</sup>): countries' potential dam capacity</p> <p><math>\alpha_1, \alpha_2, \alpha_3</math>, and <math>\alpha_4</math> (-): countries' emphasis on multiplicative variables of decision making</p> <p><math>PS_t</math> (-): countries' relative political stability at time t</p> <p><math>FDI_t</math> (-): countries' foreign direct</p> |
|                          | $WC_{Sud,t} = \left( \beta_{1,Sud} \cdot \frac{FC_{Sud,t}}{FP_{Sud,t}} + \beta_{2,Sud} \cdot \frac{PEC_{Sud}}{HP_{Sud,t}} + \beta_{3,Sud} \cdot \frac{S_{Sud,t}}{PDC_{Sud}} \right)^{\alpha_{1,Sud}} \cdot (1 - PS_{Sud,t})^{\alpha_{2,Sud}} \cdot (1 - FDI_{Sud,t})^{\alpha_{3,Sud}} \cdot \left( \frac{CS_{Sud,t}}{n} \right)^{\alpha_{4,Sud}} \quad (2)$                                         |                                                                                                                                                                                                                                                                                                                                                                                                                                                                                                                                                                                                                                                                                                                                                                                                                                                                                                                                                                                                |
|                          | $WC_{Egy,t} = \left( \beta_{1,Egy} \cdot \frac{FC_{Egy,t}}{FP_{Egy,t}} \right)^{\alpha_{1,Egy}} \cdot (1 - PS_{Egy,t})^{\alpha_{2,Egy}} \cdot (1 - FDI_{Egy,t})^{\alpha_{3,Egy}} \cdot \left( \frac{CS_{Egy,t}}{n} \right)^{\alpha_{4,Egy}} \quad (3)$                                                                                                                                              |                                                                                                                                                                                                                                                                                                                                                                                                                                                                                                                                                                                                                                                                                                                                                                                                                                                                                                                                                                                                |

|                           |                                                                                                                                                                                                                                                                                                                                                                                                                                                                                                                                                                                                                                                                                                                                                                                                                  |                                                                                                                                                 |                                                                                                                                                                                                                                                                                                                                                                                                                                                                                                                                                                |                                                                           |
|---------------------------|------------------------------------------------------------------------------------------------------------------------------------------------------------------------------------------------------------------------------------------------------------------------------------------------------------------------------------------------------------------------------------------------------------------------------------------------------------------------------------------------------------------------------------------------------------------------------------------------------------------------------------------------------------------------------------------------------------------------------------------------------------------------------------------------------------------|-------------------------------------------------------------------------------------------------------------------------------------------------|----------------------------------------------------------------------------------------------------------------------------------------------------------------------------------------------------------------------------------------------------------------------------------------------------------------------------------------------------------------------------------------------------------------------------------------------------------------------------------------------------------------------------------------------------------------|---------------------------------------------------------------------------|
|                           |                                                                                                                                                                                                                                                                                                                                                                                                                                                                                                                                                                                                                                                                                                                                                                                                                  | investment at time $t$<br>$CS_t$ (-): countries' memory of cooperation at time $t$<br>$n$ (-): the total number of riparian countries (i.e., 3) |                                                                                                                                                                                                                                                                                                                                                                                                                                                                                                                                                                |                                                                           |
| The Memory of Cooperation | $ST_{k,t} = \gamma_{k,1,1} \cdot \overline{WC}_{-k,t-1} + \gamma_{k,1,2} \cdot \overline{WC}_{-k,t-2} + \dots + \gamma_{k,1,m} \cdot \overline{WC}_{-k,t-m}$ $ST_{k,2,t} = \gamma_{k,2,1} \cdot \overline{WC}_{-k,t-1} + \gamma_{k,2,2} \cdot \overline{WC}_{-k,t-2} + \dots + \gamma_{k,2,m} \cdot \overline{WC}_{-k,t-m}$ $\vdots$ $ST_{k,i,t} = \gamma_{k,i,1} \cdot \overline{WC}_{-k,t-1} + \gamma_{k,i,2} \cdot \overline{WC}_{-k,t-2} + \dots + \gamma_{k,i,m} \cdot \overline{WC}_{-k,t-m}$ $\varepsilon_{k,i,t} =  ST_{k,i,t-1} - \overline{WC}_{-k,t-1}  +  ST_{k,i,t-2} - \overline{WC}_{-k,t-2}  + \dots +  ST_{k,i,t-m} - \overline{WC}_{-k,t-m} $ $\hat{\Phi}_{k,t} = \min\{\varepsilon_{k,1,t}, \varepsilon_{k,2,t}, \dots, \varepsilon_{k,i,t}\}$ $CS_{k,t} = CS(ST_{k,i,t}   \hat{\Phi}_{k,t})$ | <p>(4)</p> <p>(5)</p> <p>(6)</p> <p>(7)</p>                                                                                                     | $S_{k,1,t}$ (-): the $i$ th strategy of country $k$ at time $t$<br>$\gamma_{k,i,m}$ (-): the weight for the $i$ th strategy at time $t - m$<br>$\overline{WC}_{-k,t-m}$ (-): the average of the countries' willingness to cooperate but country $k$ at time $t - m$<br>$m$ (-): memory span<br>$i$ (-): number of strategies<br>$\varepsilon_{k,i,t}$ (-): the residual of the $i$ th strategy for country $k$ at time $t$<br>$\hat{\Phi}_{k,t}$ (-): the minimum residual of different strategies included in a bag of strategies for country $k$ at time $t$ |                                                                           |
|                           | Basin-wide Cooperation                                                                                                                                                                                                                                                                                                                                                                                                                                                                                                                                                                                                                                                                                                                                                                                           | $BC_t = \frac{1}{3} \times (WC_{Eth,t} + WC_{Sud,t} + WC_{Egy,t})$                                                                              | (8)                                                                                                                                                                                                                                                                                                                                                                                                                                                                                                                                                            | $BC_t$ (-): basin-wide cooperation                                        |
|                           | Food Production                                                                                                                                                                                                                                                                                                                                                                                                                                                                                                                                                                                                                                                                                                                                                                                                  | $FP_{Eth,t} = A_{ig,Eth,t} \cdot CY_{ig,Eth,t} + A_{rf,Eth,t} \cdot CY_{rf,Eth,t}$                                                              | (9)                                                                                                                                                                                                                                                                                                                                                                                                                                                                                                                                                            | $A_{ig}$ (m <sup>2</sup> ): countries' actual irrigated and rainfed areas |
|                           |                                                                                                                                                                                                                                                                                                                                                                                                                                                                                                                                                                                                                                                                                                                                                                                                                  | $FP_{Sud,t} = A_{ig,Sud,t} \cdot CY_{ig,Sud,t} + A_{rf,Sud,t} \cdot CY_{rf,Sud,t}$                                                              | (10)                                                                                                                                                                                                                                                                                                                                                                                                                                                                                                                                                           | $A_{rf}$ (m <sup>2</sup> ): countries' actual rainfed areas               |
|                           |                                                                                                                                                                                                                                                                                                                                                                                                                                                                                                                                                                                                                                                                                                                                                                                                                  | $FP_{Egy,t} = A_{ig,Egy,t} \cdot CY_{ig,Egy,t}$                                                                                                 | (11)                                                                                                                                                                                                                                                                                                                                                                                                                                                                                                                                                           | $CY_{ig}$ (kg/m <sup>2</sup> ): countries' crop                           |

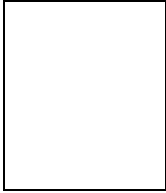

yields in irrigated  
areas  
 $CY_{rf}$  (kg/m<sup>2</sup>):  
countries' crop  
yields in rainfed  
areas
